# Supplementary material for: Ionic-liquid-processed keratin-based biocomposite films with cellulose and chitin for sustainable dye removal
Source: Royal Society of Chemistry journal article supplement (doi:10.1039/d4su00179f), 2024-01-01
Supplement: d4su00179f1.pdf [file d4su00179f1.pdf]

## Supporting Information

### **Ionic-liquid-processed keratin-based biocomposite films with cellulose and chitin for sustainable dye removal**

Cariny Polesca <sup>a,b</sup>, Helena Passos <sup>a,c,d</sup>, Pedro Y. S. Nakasu <sup>b</sup>, João A. P. Coutinho <sup>a</sup>, Mara G. Freire <sup>a\*</sup>, Jason P. Hallett <sup>b\*</sup>

<sup>a</sup> CICECO - Aveiro Institute of Materials, Department of Chemistry, University of Aveiro, 3810-193 Aveiro, Portugal

<sup>b</sup> Department of Chemical Engineering, Imperial College London, South Kensington Campus, London SW7 2AZ, United Kingdom

<sup>c</sup> LSRE-LCM – Laboratory of Separation and Reaction Engineering - Laboratory of Catalysis and Materials, Faculty of Engineering, University of Porto, 4200-465 Porto, Portugal

<sup>d</sup> ALiCE – Associate Laboratory in Chemical Engineering, Faculty of Engineering, University of Porto, 4200-465 Porto, Portugal

\* Corresponding authors:

Email addresses: maragfreire@ua.pt and j.hallett@imperial.ac.uk

Number of pages: 04

Number of figures: 05

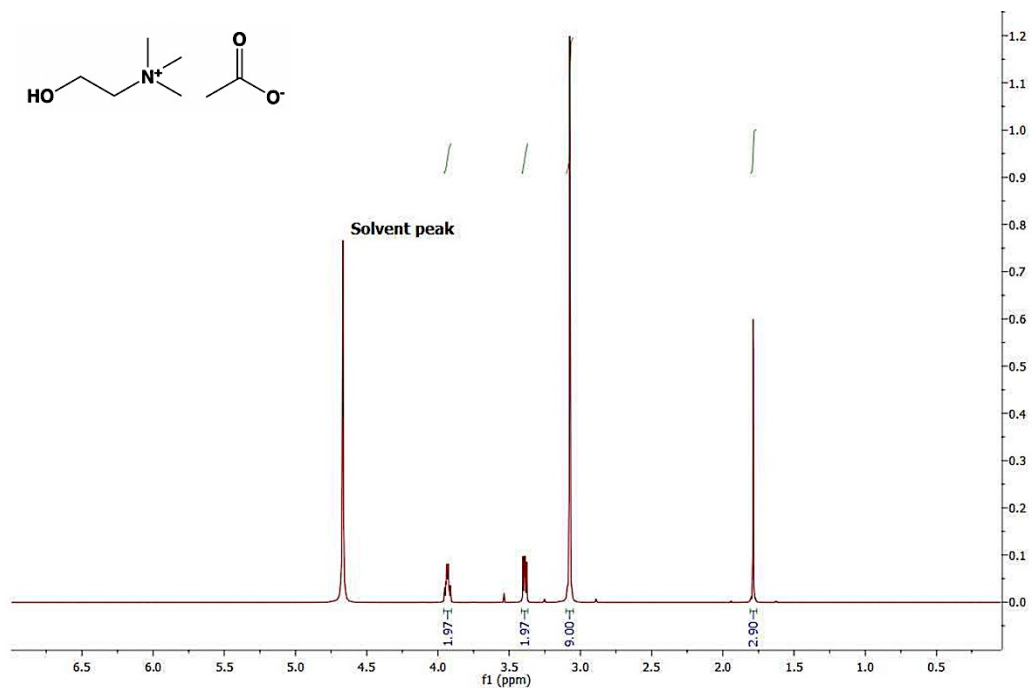

**Figure S1.** Cholinium acetate,  $[N_{111}(2OH)][C_1CO_2]$ ,  $^1H$  NMR ( $D_2O$ , 500 MHz, [ppm]): 3.93 (2H, m); 3.39 (2H, t,  $J = 20$  Hz); 3.08 (3H, s); 1.79 (3H, s).

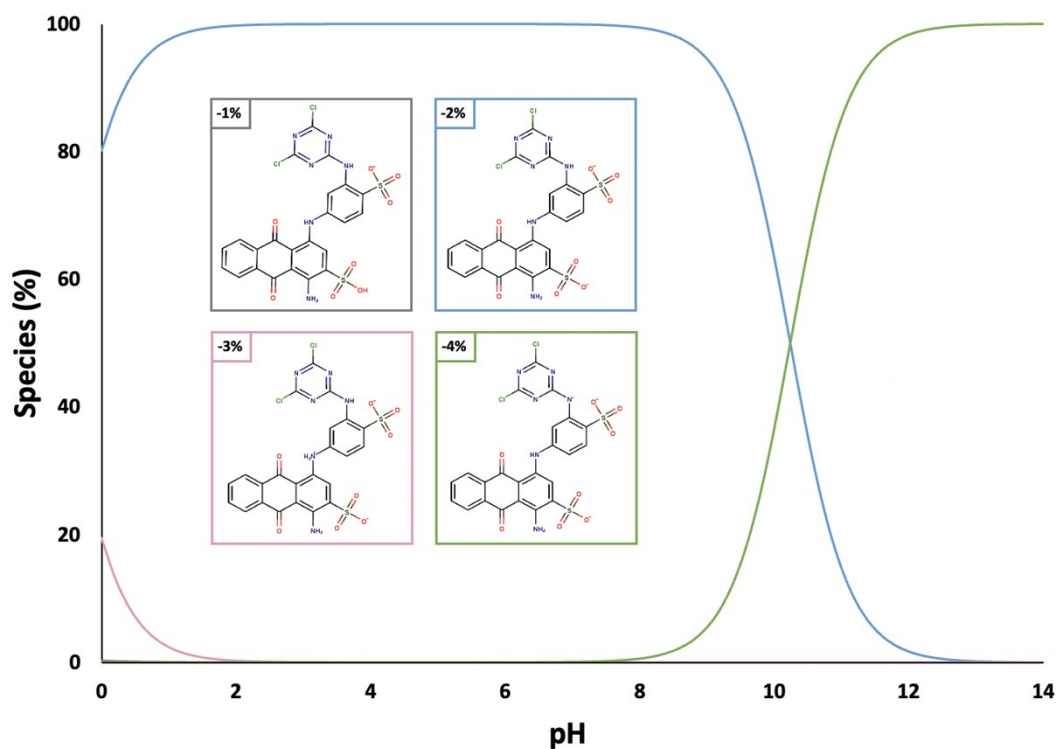

**Figure S2.** Evaluation of the pH on the speciation changes of Reactive Blue 4 dye. The grey, blue, pink, and green curves represent the deprotonation percentage of Reactive Blue 4 (data from Marvin 21.14) <sup>33</sup>.

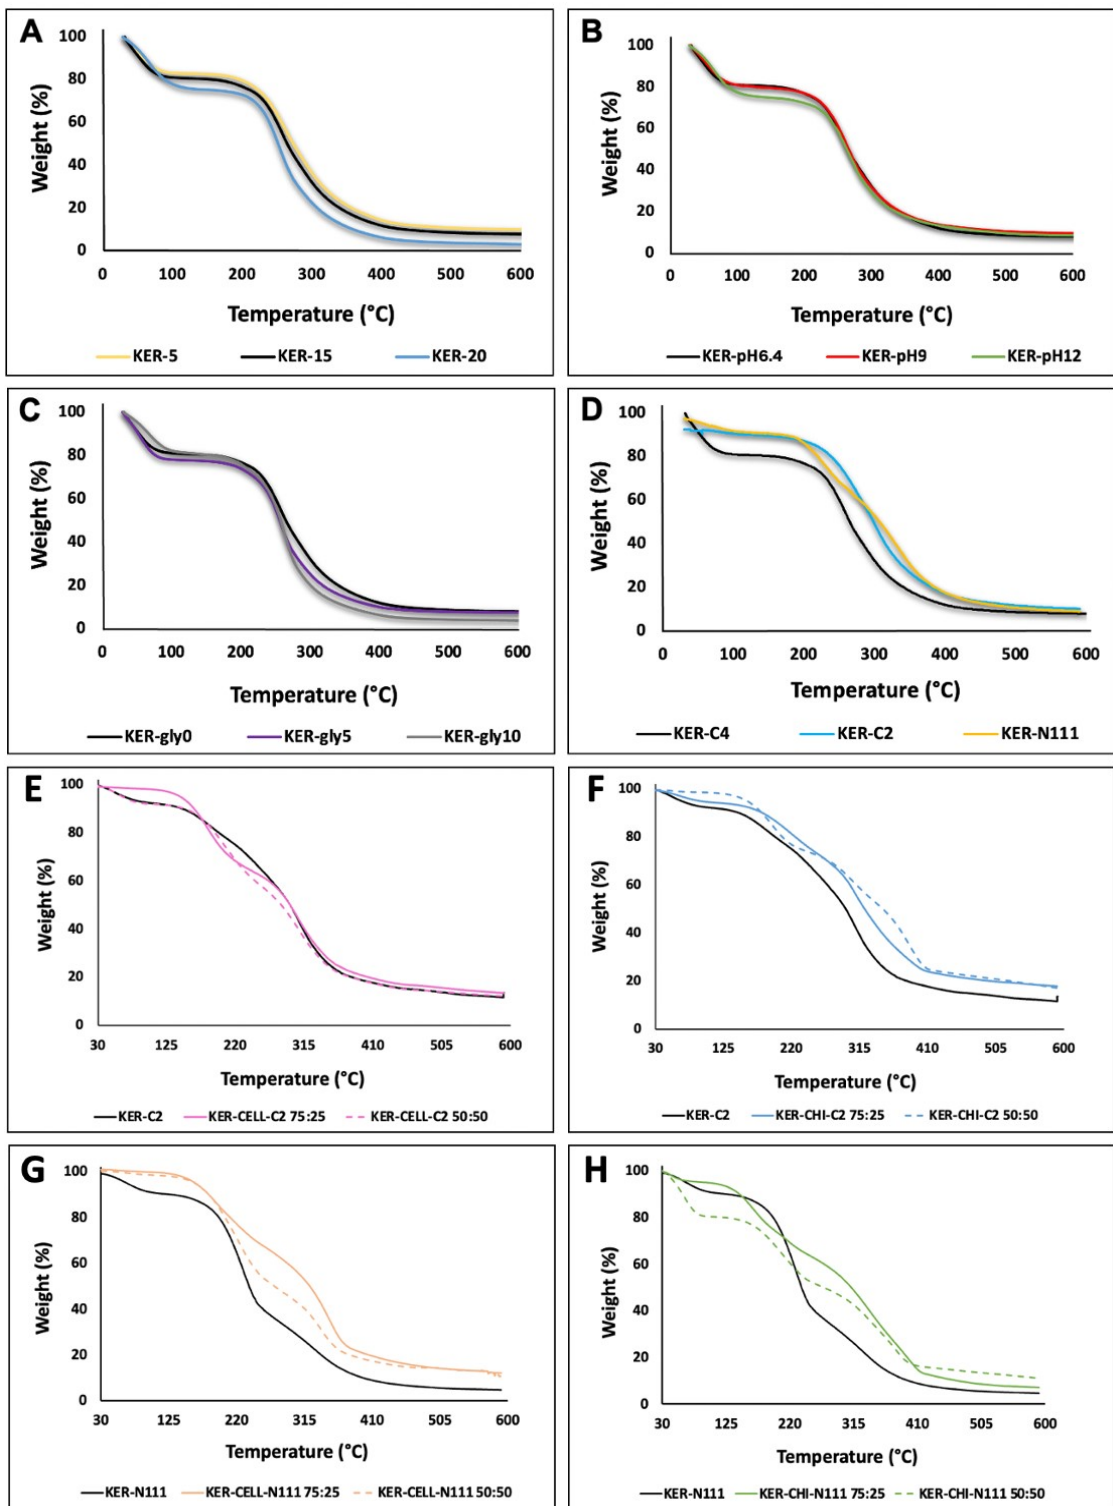

**Figure S3.** TGA curves of the keratin films (A-D); keratin-cellulose films (E and G); and keratin-chitin films (F and H) samples processed using different conditions.

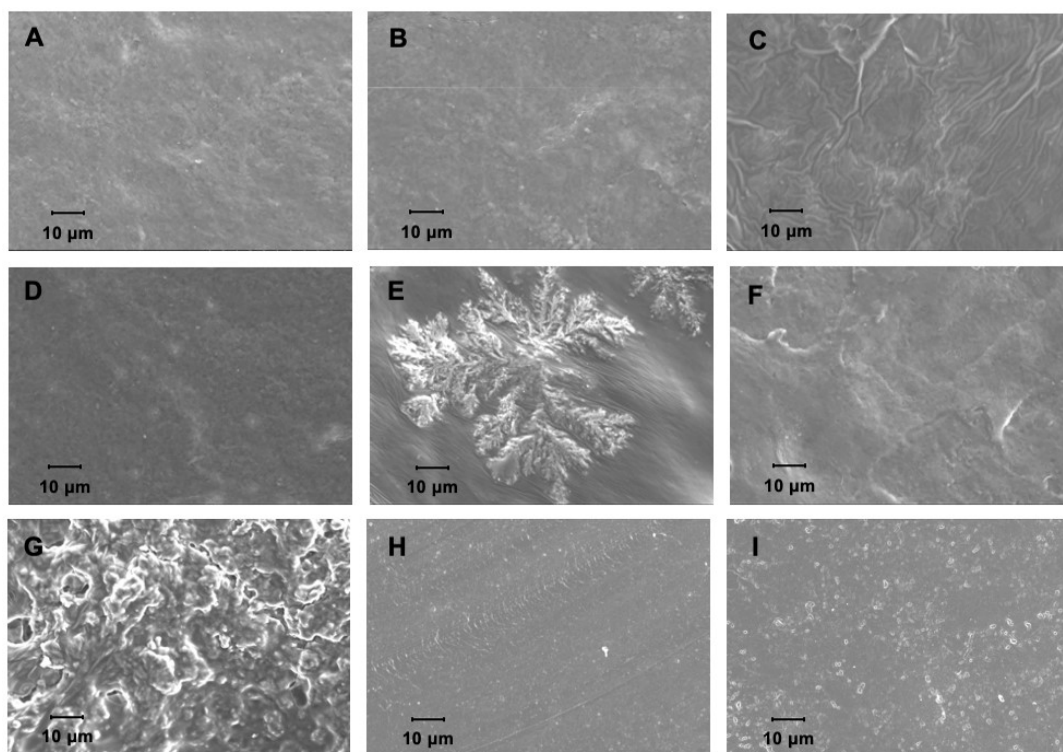

**Figure S4.** SEM images of keratin films: KER-5 (A); KER-15 (B); KER-20 (C); KER-pH9 (D); KER-pH12 (E); KER-gly5 (F); KER-gly10 (G); KER-C2 (H); KER-N111 (I).

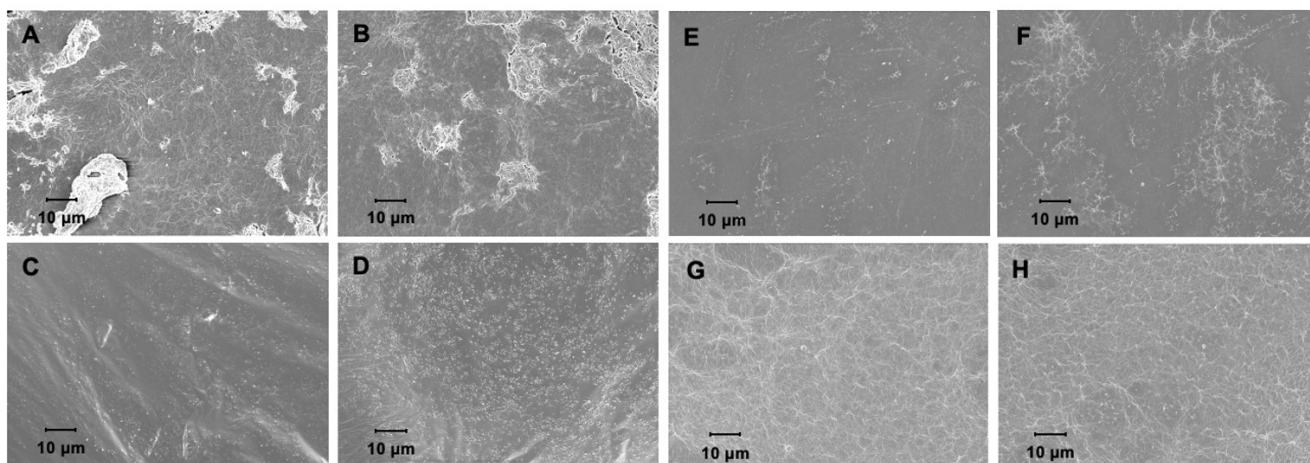

**Figure S5.** SEM images of keratin blended films processed with different ILs (A-D)  $[C_2C_1im][C_1CO_2]$  and (E-H)  $[N_{111(20H)}][C_1CO_2]$ : KER-CELL-C2 75:25 (A); KER-CELL-C2 50:50 (B); KER-CHI-C2 75:25 (C); KER-CHI-C2 50:50 (D); KER-CELL-N111 75:25 (E); KER-CELL-N111 50:50 (F); KER-CHI-N111 75:25 (G); KER-CHI-N111 50:50 (H).
